# Supplementary material for: Upconversion fluorescence immunochromatographic assay for highly sensitive and rapid detection of ovarian function indicators: follicle-stimulating hormone and anti-Müllerian hormone
Source: Royal Society of Chemistry journal article supplement (doi:10.1039/d5ay00500k), 2025-01-01
Supplement: d5ay00500k1.pdf [file d5ay00500k1.pdf]

## Supplementary Information

### **Upconversion Fluorescence Immunochromatographic Assay for Highly Sensitive and Rapid Detection of Ovarian Function Indicators Follicle-stimulating hormone and anti-Müllerian hormone**

Jianfeng Yao,<sup>#a</sup> Ming Li,<sup>#b</sup> Rongfu Huang,<sup>c</sup> Yanting Wang,<sup>a</sup> Liang Song,<sup>\*d</sup> Liying Chen,<sup>\*a</sup> and Zhenzhu Zheng,<sup>\*a</sup>

<sup>a</sup> Quanzhou Maternity and Child Healthcare Hospital, Quanzhou 362000, P.R. China

<sup>b</sup> Department of Histology and Embryology, Hunan University of Medicine, Huaihua, P. R. China

<sup>c</sup> The Second Affiliated Hospital Of Fujian Medical University, Quanzhou 36200, P.R.China

<sup>d</sup> Xiamen Institute of Rare Earth Materials, Haixi Institute, Chinese Academy of Sciences, Xiamen 361021, China

E-mail: smilepearl@126.com (Z Zheng), aziliying@163.com (L Chen), songliang@fjirsm.ac.cn (L Song)

<sup>#</sup> These authors contributed equally to this work.

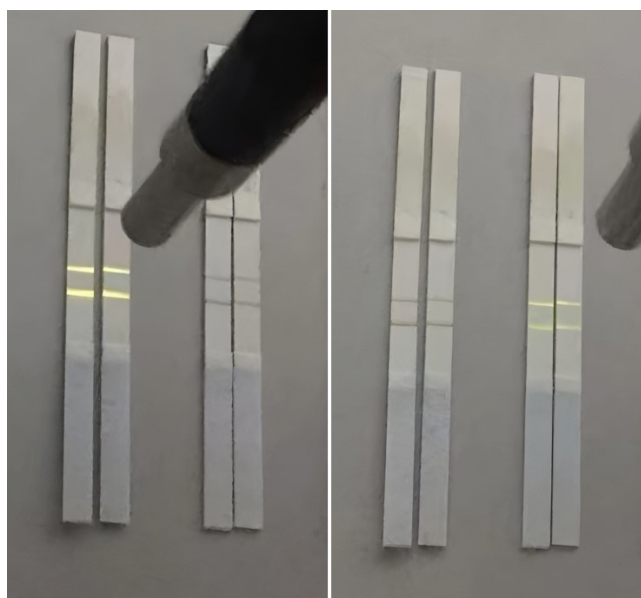

**Fig. S1** Photographs of upconversion fluorescence visualization detection results for FSH serum samples (concentration: 40.89 ng/mL (left) and 7.89 ng/mL (right)) under natural light condition.

**Table S1 Thermal stability test results of rare earth upconversion fluorescent immunochromatographic test strips**

|      | FSH         |            | AMH        |            |
|------|-------------|------------|------------|------------|
| Days | CV (%)      |            |            |            |
|      | 42.32 ng/mL | 5.12 ng/mL | 9.57 ng/mL | 4.42 ng/mL |
| 3    | 6.89        | 7.23       | 7.34       | 5.79       |
| 6    | 6.53        | 6.98       | 6.56       | 5.21       |
| 12   | 5.99        | 7.77       | 6.63       | 6.06       |
| 24   | 7.12        | 8.12       | 8.24       | 5.42       |
| 30   | 7.68        | 8.63       | 8.01       | 5.55       |
